# Supplementary material for: Genomic Characterization of Large Heterochromatic Gaps in the Human Genome Assembly
Source: PubMed Central journal article supplement (PMC4022460; doi:10.1371/journal.pcbi.1003628), 2014-05-15
Supplement: pcbi.1003628.s005.pdf [file pcbi.1003628.s005.pdf]

**Table S1. Comparisons of HSat2,3 subfamilies with published clone sequences**

| Subfamily Name | Published clone sequences matching subfamily-specific 24-mers [citation] | Published clone chromosomal localizations | Published repeat unit size (bp) |
|----------------|--------------------------------------------------------------------------|-------------------------------------------|---------------------------------|
| HSat2A1        | cMEN375 [Jackson et al. 1992]                                            | 10                                        | -                               |
| HSat2A2        | pUC1.77 [Cooke and Hindley 1979]                                         | 1                                         | 1775                            |
|                | cb2 [Jeanpierre et al. 1994]                                             | 1                                         | -                               |
| HSat2B         | pHuR195 [Moyzis et al. 1987]                                             | 16                                        | -                               |
|                | HUMPPD17 [Deininger et al. 1981]                                         | -                                         | -                               |
| HSat3A1        | pW-1* [Bandyopadhyay et al. 2001]                                        | 13,21                                     | 1524                            |
|                | cMEN219 [Jackson et al. 1993]                                            | 10                                        | -                               |
|                | QP23 [Jeanpierre et al. 1985]                                            | 22                                        | -                               |
| HSat3A2        | pE-1* [Bandyopadhyay et al. 2001]                                        | 13,14,21                                  | 1748                            |
|                | pK-1* [Bandyopadhyay et al. 2001]                                        | 14,22                                     | 806                             |
| HSat3A3        |                                                                          |                                           |                                 |
| HSat3A4        | pTRS-47* [Choo et al. 1990]                                              | 14,22                                     | 1366                            |
|                | pR-1* [Bandyopadhyay et al. 2001]                                        | 13,14,15,21,22                            | 1529                            |
|                | pR-2* [Bandyopadhyay et al. 2001]                                        | 13,14,15,21,22                            | 1556                            |
|                | pR-4* [Bandyopadhyay et al. 2001]                                        | 13,14,15,21,22                            | 1026                            |
|                | pE-2* [Bandyopadhyay et al. 2001]                                        | 13,14,21                                  | 584                             |
| HSat3A5        | HUMRSKPNI [Higgins et al. 1985]                                          | 15                                        | 1800/3600                       |
| HSat3A6        | chrY-DYZ1* [Nakahori et al. 1986]                                        | Y                                         | 3564                            |
| HSat3B1        |                                                                          |                                           |                                 |
| HSat3B2        | pTRS-63* [Choo et al. 1992]                                              | 14                                        | 1404                            |
|                | HUMASAT3* [Vissel et al. 1992]                                           | 13,14,21                                  | 1483                            |
| HSat3B3        | HUMPPD9 [Deininger et al. 1981]                                          | -                                         | -                               |
| HSat3B4        |                                                                          |                                           |                                 |
| HSat3B5        | pHuR98 [Moyzis et al. 1987]                                              | 9                                         | -                               |

\*these clones represent complete repeat units that have been sequenced. All others are incomplete fragments.
