# Supplementary material for: Genomic Characterization of Large Heterochromatic Gaps in the Human Genome Assembly
Source: PubMed Central journal article supplement (PMC4022460; doi:10.1371/journal.pcbi.1003628), 2014-05-15
Supplement: pcbi.1003628.s006.pdf [file pcbi.1003628.s006.pdf]

Table S2. Proportion of self-paired reads in all pairwise subfamily comparisons.

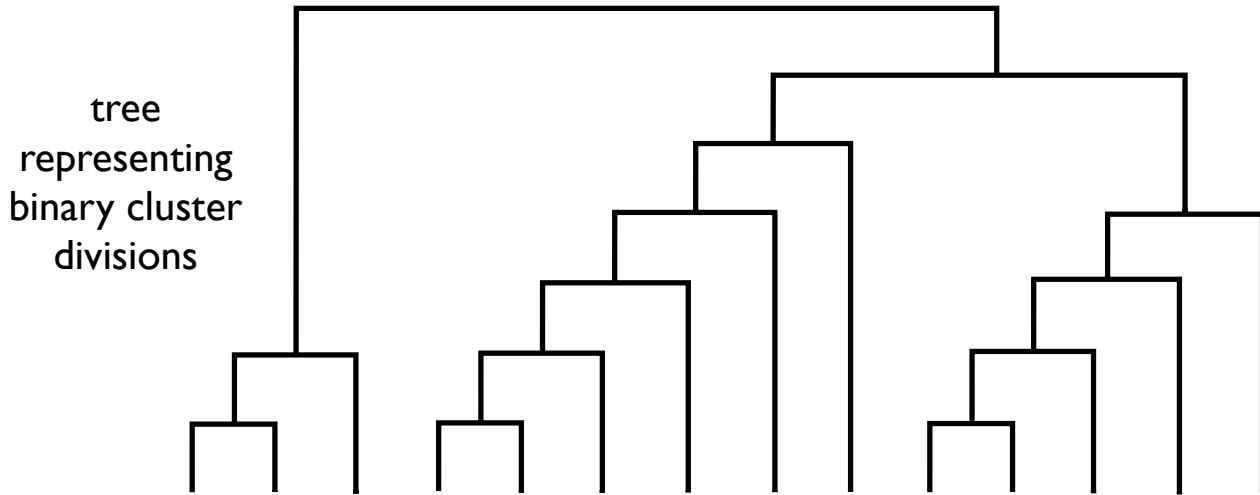

**Pairwise self-mate-pair frequency of each subfamily (row) with each other subfamily (column)**

|            | <b>2A1</b> | <b>2A2</b> | <b>2B</b> | <b>3A1</b> | <b>3A2</b> | <b>3A3</b> | <b>3A4</b> | <b>3A5</b> | <b>3A6</b> | <b>3B1</b> | <b>3B2</b> | <b>3B3</b> | <b>3B4</b> | <b>3B5</b> |
|------------|------------|------------|-----------|------------|------------|------------|------------|------------|------------|------------|------------|------------|------------|------------|
| <b>2A1</b> |            | 0.8322     | 0.9769    | 0.9998     | 0.9990     | 0.9998     | 0.9996     | 1.0000     | 0.9998     | 1.0000     | 1.0000     | 0.9987     | 1.0000     | 0.9998     |
| <b>2A2</b> | 0.9788     |            | 0.9961    | 1.0000     | 0.9998     | 1.0000     | 1.0000     | 1.0000     | 0.9999     | 1.0000     | 1.0000     | 0.9993     | 1.0000     | 1.0000     |
| <b>2B</b>  | 0.9976     | 0.9963     |           | 0.9986     | 0.9993     | 0.9999     | 0.9993     | 1.0000     | 1.0000     | 1.0000     | 1.0000     | 0.9991     | 1.0000     | 0.9999     |
| <b>3A1</b> | 0.9996     | 0.9991     | 0.9720    |            | 0.9065     | 0.9969     | 0.9456     | 0.9766     | 0.9869     | 0.9899     | 0.9741     | 0.9491     | 0.9982     | 0.9839     |
| <b>3A2</b> | 0.9983     | 0.9973     | 0.9895    | 0.9280     |            | 0.9283     | 0.9018     | 0.7253     | 0.9388     | 0.9980     | 0.9960     | 0.9665     | 0.9980     | 0.9964     |
| <b>3A3</b> | 0.9995     | 0.9995     | 0.9970    | 0.9965     | 0.8965     |            | 0.9921     | 0.9867     | 0.9848     | 1.0000     | 0.9990     | 0.9941     | 1.0000     | 0.9990     |
| <b>3A4</b> | 0.9995     | 0.9995     | 0.9922    | 0.9698     | 0.9273     | 0.9962     |            | 0.9773     | 0.9678     | 0.9988     | 0.9910     | 0.9805     | 0.9962     | 0.9976     |
| <b>3A5</b> | 1.0000     | 0.9999     | 1.0000    | 0.9953     | 0.9090     | 0.9976     | 0.9915     |            | 0.9987     | 1.0000     | 0.9996     | 0.9987     | 0.9999     | 0.9995     |
| <b>3A6</b> | 1.0000     | 0.9999     | 1.0000    | 0.9992     | 0.9946     | 0.9991     | 0.9961     | 0.9996     |            | 1.0000     | 1.0000     | 0.9999     | 0.9999     | 0.9996     |
| <b>3B1</b> | 1.0000     | 0.9980     | 0.9990    | 0.9770     | 0.9939     | 1.0000     | 0.9949     | 1.0000     | 0.9990     |            | 0.8889     | 0.7783     | 1.0000     | 0.9578     |
| <b>3B2</b> | 1.0000     | 1.0000     | 0.9994    | 0.9672     | 0.9933     | 0.9989     | 0.9790     | 0.9977     | 0.9994     | 0.9356     |            | 0.8033     | 0.9938     | 0.9736     |
| <b>3B3</b> | 0.9995     | 0.9975     | 0.9970    | 0.9908     | 0.9921     | 0.9991     | 0.9937     | 0.9989     | 0.9996     | 0.9792     | 0.9679     |            | 0.9728     | 0.9037     |
| <b>3B4</b> | 1.0000     | 1.0000     | 1.0000    | 0.9991     | 0.9986     | 1.0000     | 0.9964     | 0.9998     | 0.9995     | 1.0000     | 0.9975     | 0.9230     |            | 0.9792     |
| <b>3B5</b> | 1.0000     | 0.9999     | 0.9999    | 0.9989     | 0.9997     | 0.9999     | 0.9997     | 0.9998     | 0.9996     | 0.9988     | 0.9986     | 0.9614     | 0.9973     |            |
