# Supplementary material for: Genomic Characterization of Large Heterochromatic Gaps in the Human Genome Assembly
Source: PubMed Central journal article supplement (PMC4022460; doi:10.1371/journal.pcbi.1003628), 2014-05-15
Supplement: pcbi.1003628.s008.pdf [file pcbi.1003628.s008.pdf]

**Table S4. Subfamily-specific 24-mers identified within each subfamily.**

|            | <b>All redundant 24-mers (&gt;2x)</b> | <b>Non-redundant 24-mers</b> | <b>Fold compression</b> | <b>Non-redundant, subfamily-specific 24-mers</b> | <b>Prop. all 24-mers matching subfamily-specific 24-mer</b> |
|------------|---------------------------------------|------------------------------|-------------------------|--------------------------------------------------|-------------------------------------------------------------|
| <b>2A1</b> | 4944839                               | 144609                       | 34.2                    | 1438                                             | 0.1839                                                      |
| <b>2A2</b> | 36975281                              | 290834                       | 127.1                   | 773                                              | 0.1019                                                      |
| <b>2B</b>  | 41324950                              | 753334                       | 54.9                    | 6942                                             | 0.548                                                       |
| <b>3A1</b> | 2983321                               | 404377                       | 7.4                     | 446                                              | 0.0138                                                      |
| <b>3A2</b> | 4839857                               | 620427                       | 7.8                     | 756                                              | 0.0488                                                      |
| <b>3A3</b> | 2028674                               | 192076                       | 10.6                    | 6554                                             | 0.4499                                                      |
| <b>3A4</b> | 4567620                               | 767622                       | 6.0                     | 65                                               | 0.0024                                                      |
| <b>3A5</b> | 10245675                              | 289086                       | 35.4                    | 956                                              | 0.043                                                       |
| <b>3A6</b> | 31322460                              | 383824                       | 81.6                    | 2696                                             | 0.4593                                                      |
| <b>3B1</b> | 1169330                               | 111918                       | 10.4                    | 2689                                             | 0.2049                                                      |
| <b>3B2</b> | 2121628                               | 192363                       | 11.0                    | 3183                                             | 0.1545                                                      |
| <b>3B3</b> | 12620891                              | 760552                       | 16.6                    | 532                                              | 0.0178                                                      |
| <b>3B4</b> | 3734728                               | 173652                       | 21.5                    | 1238                                             | 0.1187                                                      |
| <b>3B5</b> | 27294438                              | 547585                       | 49.8                    | 945                                              | 0.1219                                                      |
