# Supplementary material for: Genomic Characterization of Large Heterochromatic Gaps in the Human Genome Assembly
Source: PubMed Central journal article supplement (PMC4022460; doi:10.1371/journal.pcbi.1003628), 2014-05-15
Supplement: pcbi.1003628.s009.pdf [file pcbi.1003628.s009.pdf]

**Table S5. WCS datasets used in this analysis.**

| Target chr(s) | Donor ID | Donor sex | Center code | No. reads | Trace Archive query terms                                                                                           |
|---------------|----------|-----------|-------------|-----------|---------------------------------------------------------------------------------------------------------------------|
| 1             | 11321    | M         | SC          | 606,874   | center_project='CHR_1_11321'                                                                                        |
| 1             | 17109    | M         | SC          | 737,140   | center_project='CHR_1_17109'                                                                                        |
| 1             | 07340    | F         | SC          | 679,330   | center_project='CHR_1_7340'                                                                                         |
| 2             | 17119    | F         | WUGSC       | 912,044   | center_name = 'WUGSC' and species_code='HOMO SAPIENS' and (chromosome='CHR02' or chromosome='2') and strategy='WCS' |
| 4             | 17119    | F         | WIBR        | 619,329   | center_project='S246'                                                                                               |
| 4-5           | 17119    | F         | WIBR        | 363,729   | center_project='S223'                                                                                               |
| 5             | 17119    | F         | WIBR        | 480,263   | center_project='S224' or center_project = 'S247'                                                                    |
| 6             | 11321    | M         | SC          | 561,174   | center_project='CHR_6_11321'                                                                                        |
| 6             | 17119    | F         | SC          | 506,469   | center_project='CHR_6_17119'                                                                                        |
| 6             | 07340    | F         | SC          | 568,268   | center_project='CHR_6_7340'                                                                                         |
| 7             | 17119    | F         | WUGSC       | 311,439   | strategy = 'WCS' and center_name = 'WUGSC' and chromosome='7'                                                       |
| 8-9           | 17119    | F         | WIBR        | 685,493   | center_project='S225' or center_project='S248'                                                                      |
| 9-12          | 07340    | F         | SC          | 938,978   | center_project='CHR_9-12_7340'                                                                                      |
| 13            | 11321    | M         | SC          | 318,804   | center_project='CHR_13_11321'                                                                                       |
| 13            | 17119    | F         | SC          | 317,029   | center_project='CHR_13_17119'                                                                                       |
| 13            | 07340    | F         | SC          | 348,128   | center_project='CHR_13_7340'                                                                                        |
| 14            | 17119    | F         | WIBR        | 353,264   | center_project='S226' or center_project='S249'                                                                      |
| 18            | 17109    | M         | WIBR        | 276,943   | center_project='S227' or center_project='S250'                                                                      |
| 20            | 10470    | M         | SC          | 287,810   | seq_lib_id='45079'                                                                                                  |
| 20            | 11321    | M         | SC          | 371,611   | seq_lib_id='47841' or seq_lib_id='45081'                                                                            |
| 20            | 17119    | M         | SC          | 264,442   | seq_lib_id='45080'                                                                                                  |
| 20            | 07340    | F         | SC          | 361,607   | seq_lib_id='44340'                                                                                                  |
| 21            | 17119    | F         | WUGSC       | 116,714   | strategy='WCS' and center_name='WUGSC' and chromosome='21'                                                          |
| 22            | 10470    | M         | SC          | 220,600   | center_project='CHR_22_10470'                                                                                       |
| 22            | 11321    | M         | SC          | 265,034   | center_project='CHR_22_11321'                                                                                       |
| 22            | 17119    | F         | SC          | 202,925   | center_project='CHR_22_17119'                                                                                       |
| 22            | 07340    | F         | SC          | 222,795   | center_project='CHR_22_7340'                                                                                        |
| X             | 10470    | M         | SC          | 48,419    | center_project='CHR_X_10470'                                                                                        |
| X             | 11321    | M         | SC          | 394,822   | center_project='CHR_X_11321'                                                                                        |
| X             | 17119    | F         | SC          | 463,386   | center_project='CHR_X_17119'                                                                                        |
| X             | 07340    | F         | SC          | 463,719   | center_project='CHR_X_7340'                                                                                         |
| Y             | 17109    | M         | WIBR        | 96,768    | center_project='S228'                                                                                               |
