# Supplementary material for: Genomic Characterization of Large Heterochromatic Gaps in the Human Genome Assembly
Source: PubMed Central journal article supplement (PMC4022460; doi:10.1371/journal.pcbi.1003628), 2014-05-15
Supplement: pcbi.1003628.s010.pdf [file pcbi.1003628.s010.pdf]

**Table S6. Mixing matrix estimating percent of WCS reads from each chromosome for each sample.**

| Target Chr(s) | Donor ID | 1     | 2     | 3    | 4     | 5     | 6     | 7     | 8     | 9     | 10    | 11    | 12    | 13    | 14    | 15   | 16   | 17   | 18    | 19   | 20    | 21    | 22    | X     | Y     |
|---------------|----------|-------|-------|------|-------|-------|-------|-------|-------|-------|-------|-------|-------|-------|-------|------|------|------|-------|------|-------|-------|-------|-------|-------|
| 1             | 11321    | 85.13 | 1.92  | 1.05 | 0.15  | 1.30  | 2.29  | 0.70  | 0.94  | 0.61  | 0.50  | 0.40  | 0.42  | 0.31  | 0.69  | 0.76 | 0.77 | 0.56 | 0.22  | 0.21 | 0.30  | 0.19  | 0.25  | 0.28  | 0.05  |
| 1             | 17109    | 78.63 | 1.44  | 1.50 | 0.39  | 1.88  | 1.71  | 2.19  | 0.90  | 1.04  | 0.99  | 0.85  | 1.02  | 0.81  | 1.03  | 1.27 | 1.02 | 0.69 | 0.27  | 0.37 | 0.45  | 0.28  | 0.37  | 0.69  | 0.20  |
| 1             | 7340     | 79.89 | 0.56  | 0.49 | 0.11  | 1.78  | 1.53  | 1.67  | 1.23  | 0.81  | 0.96  | 1.00  | 0.74  | 0.27  | 1.65  | 1.51 | 1.26 | 1.00 | 0.23  | 0.59 | 0.30  | 0.37  | 0.28  | 1.78  | 0.00  |
| 2             | 17119    | 3.88  | 74.44 | 1.32 | 1.59  | 1.76  | 1.26  | 1.59  | 1.29  | 1.06  | 0.91  | 0.83  | 1.05  | 2.61  | 0.64  | 1.00 | 0.35 | 0.11 | 1.25  | 0.15 | 0.56  | 0.40  | 0.30  | 1.63  | 0.00  |
| 4-5           | 17119    | 0.33  | 0.38  | 1.45 | 71.42 | 22.28 | 1.13  | 0.24  | 0.20  | 0.20  | 0.17  | 0.18  | 0.21  | 0.37  | 0.21  | 0.16 | 0.12 | 0.10 | 0.29  | 0.05 | 0.07  | 0.07  | 0.08  | 0.30  | 0.00  |
| 4             | 17119    | 0.30  | 0.31  | 1.25 | 94.99 | 0.33  | 0.28  | 0.22  | 0.23  | 0.20  | 0.19  | 0.17  | 0.18  | 0.27  | 0.13  | 0.13 | 0.09 | 0.08 | 0.16  | 0.04 | 0.08  | 0.06  | 0.07  | 0.21  | 0.00  |
| 5             | 17119    | 0.49  | 0.53  | 2.06 | 2.01  | 86.63 | 3.58  | 0.35  | 0.40  | 0.27  | 0.25  | 0.26  | 0.28  | 0.74  | 0.35  | 0.25 | 0.17 | 0.13 | 0.47  | 0.07 | 0.10  | 0.13  | 0.07  | 0.42  | 0.00  |
| 6             | 11321    | 0.30  | 0.34  | 0.28 | 0.31  | 3.02  | 92.01 | 0.29  | 0.24  | 0.23  | 0.20  | 0.21  | 0.24  | 0.48  | 0.21  | 0.23 | 0.15 | 0.12 | 0.24  | 0.05 | 0.14  | 0.12  | 0.07  | 0.42  | 0.11  |
| 6             | 17119    | 0.37  | 0.40  | 0.49 | 0.46  | 9.40  | 82.62 | 0.46  | 0.35  | 0.28  | 0.31  | 0.24  | 0.29  | 1.26  | 0.22  | 0.29 | 0.13 | 0.20 | 0.58  | 0.08 | 0.20  | 0.36  | 0.06  | 0.97  | 0.01  |
| 6             | 7340     | 0.33  | 0.33  | 0.32 | 0.29  | 5.49  | 88.24 | 0.23  | 0.20  | 0.18  | 0.18  | 0.18  | 0.20  | 2.21  | 0.27  | 0.17 | 0.09 | 0.09 | 0.25  | 0.05 | 0.17  | 0.13  | 0.07  | 0.30  | 0.01  |
| 7             | 17119    | 0.51  | 0.65  | 0.59 | 0.43  | 0.53  | 1.29  | 87.78 | 1.01  | 0.61  | 0.34  | 0.32  | 0.43  | 1.57  | 0.96  | 0.39 | 0.22 | 0.15 | 0.27  | 0.11 | 0.20  | 0.48  | 0.45  | 0.70  | 0.02  |
| 8-9           | 17119    | 0.52  | 0.62  | 0.56 | 0.50  | 0.55  | 0.59  | 0.87  | 59.43 | 26.51 | 0.35  | 0.28  | 0.96  | 0.44  | 0.49  | 0.42 | 0.18 | 0.13 | 0.47  | 0.09 | 0.29  | 0.37  | 0.09  | 5.27  | 0.00  |
| 9-12          | 7340     | 0.91  | 0.43  | 0.29 | 0.27  | 0.32  | 0.29  | 0.29  | 0.34  | 25.09 | 23.99 | 20.82 | 24.68 | 0.19  | 0.19  | 0.21 | 0.17 | 0.11 | 0.52  | 0.06 | 0.13  | 0.21  | 0.20  | 0.27  | 0.01  |
| 13            | 11321    | 0.48  | 0.53  | 0.48 | 0.73  | 0.45  | 0.35  | 0.33  | 0.33  | 0.56  | 0.46  | 0.38  | 0.48  | 92.71 | 0.24  | 0.20 | 0.15 | 0.15 | 0.21  | 0.12 | 0.13  | 0.13  | 0.11  | 0.16  | 0.14  |
| 13            | 17119    | 0.45  | 0.52  | 0.49 | 0.39  | 0.34  | 0.36  | 0.34  | 0.33  | 0.21  | 0.28  | 0.27  | 0.33  | 93.04 | 0.41  | 0.42 | 0.23 | 0.20 | 0.33  | 0.14 | 0.17  | 0.18  | 0.17  | 0.40  | 0.00  |
| 13            | 7340     | 0.23  | 0.25  | 0.20 | 0.43  | 0.20  | 0.26  | 0.16  | 0.18  | 0.19  | 0.15  | 0.16  | 0.16  | 96.50 | 0.12  | 0.10 | 0.10 | 0.08 | 0.10  | 0.04 | 0.09  | 0.06  | 0.06  | 0.18  | 0.00  |
| 14            | 17119    | 1.20  | 1.24  | 0.94 | 0.76  | 0.76  | 0.70  | 0.89  | 0.63  | 0.67  | 0.69  | 0.69  | 0.79  | 58    | 83.16 | 3.10 | 0.46 | 0.33 | 0.34  | 0.22 | 0.51  | 0.50  | 0.23  | 0.59  | 0.00  |
| 18            | 17109    | 1.01  | 1.01  | 0.73 | 0.75  | 0.71  | 1.28  | 0.86  | 0.68  | 0.60  | 0.58  | 0.61  | 0.51  | 0.52  | 0.68  | 0.44 | 0.34 | 0.56 | 86.24 | 0.22 | 0.26  | 0.24  | 0.16  | 0.56  | 0.45  |
| 20            | 10470    | 0.41  | 0.39  | 0.32 | 0.30  | 0.34  | 0.29  | 0.28  | 0.23  | 0.32  | 0.38  | 0.22  | 0.21  | 0.19  | 0.20  | 0.22 | 0.21 | 0.32 | 0.16  | 0.16 | 94.28 | 0.14  | 0.12  | 0.16  | 0.14  |
| 20            | 11321    | 0.60  | 0.54  | 0.43 | 0.45  | 0.42  | 0.39  | 0.36  | 0.34  | 0.33  | 0.40  | 0.33  | 0.29  | 0.24  | 0.25  | 0.25 | 0.29 | 0.36 | 0.19  | 0.30 | 92.47 | 0.15  | 0.37  | 0.11  | 0.13  |
| 20            | 17119    | 0.86  | 0.82  | 0.68 | 0.58  | 0.53  | 0.60  | 0.46  | 0.49  | 0.48  | 0.55  | 0.43  | 0.51  | 0.38  | 0.36  | 0.31 | 0.32 | 0.36 | 0.30  | 0.28 | 89.24 | 0.25  | 0.73  | 0.50  | 0.00  |
| 20            | 7340     | 0.42  | 0.37  | 0.29 | 0.28  | 0.28  | 0.26  | 0.19  | 0.22  | 0.23  | 0.20  | 0.22  | 0.23  | 0.15  | 0.14  | 0.14 | 0.20 | 0.21 | 0.13  | 0.12 | 95.32 | 0.08  | 0.14  | 0.17  | 0.00  |
| 21            | 17119    | 1.69  | 1.86  | 1.46 | 1.12  | 1.26  | 1.11  | 1.07  | 1.25  | 0.88  | 0.97  | 0.95  | 0.97  | 0.77  | 1.05  | 1.23 | 0.65 | 0.44 | 0.68  | 0.33 | 0.45  | 78.48 | 0.33  | 0.96  | 0.03  |
| 22            | 10470    | 0.56  | 0.44  | 0.40 | 0.36  | 0.33  | 0.34  | 0.34  | 0.32  | 0.32  | 0.25  | 0.28  | 0.27  | 0.25  | 0.23  | 0.38 | 0.22 | 0.28 | 0.16  | 0.13 | 0.20  | 0.12  | 93.61 | 0.13  | 0.06  |
| 22            | 11321    | 0.56  | 0.65  | 0.52 | 0.43  | 0.52  | 0.48  | 0.42  | 0.36  | 0.32  | 0.34  | 0.35  | 0.35  | 0.39  | 0.27  | 0.27 | 0.35 | 0.38 | 0.18  | 0.24 | 0.25  | 0.23  | 90.47 | 1.57  | 0.10  |
| 22            | 17119    | 0.79  | 0.70  | 0.67 | 0.64  | 0.55  | 0.56  | 0.50  | 0.43  | 0.38  | 0.42  | 0.40  | 0.38  | 0.39  | 0.36  | 0.34 | 0.32 | 0.32 | 0.22  | 0.16 | 0.29  | 0.21  | 90.49 | 0.47  | 0.00  |
| 22            | 7340     | 0.86  | 0.85  | 0.65 | 0.68  | 0.67  | 0.72  | 0.54  | 0.59  | 0.57  | 0.52  | 0.49  | 0.45  | 0.48  | 0.44  | 0.36 | 0.33 | 0.52 | 0.28  | 0.26 | 0.24  | 0.14  | 88.86 | 0.47  | 0.01  |
| X             | 10470    | 0.20  | 0.33  | 0.20 | 0.20  | 0.26  | 0.20  | 0.94  | 2.61  | 0.19  | 0.25  | 0.18  | 0.28  | 2.39  | 0.34  | 0.25 | 0.16 | 0.08 | 0.97  | 0.07 | 0.14  | 0.83  | 0.05  | 88.89 | 0.00  |
| X             | 11321    | 0.23  | 0.32  | 0.27 | 0.19  | 0.25  | 0.33  | 2.28  | 2.35  | 0.28  | 0.32  | 0.31  | 0.33  | 4.07  | 0.26  | 0.20 | 0.18 | 0.15 | 0.43  | 0.09 | 0.12  | 1.60  | 0.12  | 85.19 | 0.13  |
| X             | 17119    | 0.48  | 0.72  | 0.39 | 0.35  | 0.37  | 0.38  | 1.49  | 1.38  | 0.32  | 0.34  | 0.30  | 0.37  | 1.52  | 0.25  | 0.29 | 0.20 | 0.17 | 0.27  | 0.11 | 0.17  | 0.57  | 0.09  | 89.44 | 0.03  |
| X             | 7340     | 0.24  | 0.66  | 0.18 | 0.13  | 0.19  | 0.17  | 1.42  | 1.32  | 0.15  | 0.20  | 0.18  | 0.19  | 1.66  | 0.20  | 0.12 | 0.11 | 0.10 | 0.27  | 0.07 | 0.07  | 0.60  | 0.07  | 91.70 | 0.00  |
| Y             | 17109    | 0.93  | 0.75  | 0.67 | 0.82  | 0.70  | 0.69  | 0.43  | 0.42  | 0.55  | 0.51  | 0.47  | 0.51  | 0.41  | 0.36  | 0.40 | 0.27 | 0.22 | 0.35  | 0.17 | 0.21  | 0.19  | 0.13  | 0.18  | 89.67 |
| ALL           | hg19     | 8.34  | 8.14  | 6.63 | 6.40  | 6.05  | 5.73  | 5.33  | 4.90  | 4.73  | 4.54  | 4.52  | 4.48  | 3.85  | 3.59  | 3.43 | 3.02 | 2.72 | 2.61  | 1.98 | 2.11  | 1.61  | 1.72  | 2.60  | 0.99  |
