# Supplementary material for: Genomic Characterization of Large Heterochromatic Gaps in the Human Genome Assembly
Source: PubMed Central journal article supplement (PMC4022460; doi:10.1371/journal.pcbi.1003628), 2014-05-15
Supplement: pcbi.1003628.s011.pdf [file pcbi.1003628.s011.pdf]

Table S7. HSat,2,3 localization predictions from WCS data.

|    | 2A1              | 2A2                 | 2B               | 3A1        | 3A2        | 3A3           | 3A4           | 3A5             | 3A6              | 3B1       | 3B2           | 3B3           | 3B4           | 3B5              |
|----|------------------|---------------------|------------------|------------|------------|---------------|---------------|-----------------|------------------|-----------|---------------|---------------|---------------|------------------|
| 1  | 1474 [1447,1499] | 14270 [14195,14349] | 202 [159,244]    | 44 [39,51] | 27 [21,34] | 0 [0,1]       | 26 [17,34]    | 28 [14,43]      | 1 [0,2]          | 9 [6,11]  | 245 [235,256] | 111 [98,125]  | 5 [1,8]       | 32 [19,43]       |
| 2  | 2 [0,5]          | 48 [19,75]          | 523 [495,551]    | 2 [0,6]    | 8 [2,13]   | 0 [0,1]       | 9 [2,16]      | 7 [0,18]        | 0 [0,1]          | 1 [0,2]   | 0 [0,1]       | 4 [0,11]      | 4 [0,8]       | 17 [2,32]        |
| 3  | 7 [0,23]         | 10 [0,33]           | 120 [0,335]      | 13 [0,43]  | 19 [0,64]  | 4 [0,14]      | 27 [0,89]     | 27 [0,84]       | 7 [0,22]         | 5 [0,15]  | 6 [0,20]      | 165 [0,461]   | 9 [0,32]      | 46 [0,150]       |
| 4  | 0 [0,1]          | 0 [0,1]             | 1 [0,3]          | 0 [0,1]    | 2 [0,4]    | 0 [0,1]       | 23 [18,27]    | 2 [0,4]         | 1 [0,2]          | 0 [0,1]   | 0 [0,1]       | 14 [8,20]     | 0 [0,1]       | 1 [0,3]          |
| 5  | 1 [0,3]          | 1 [0,2]             | 15 [5,25]        | 1 [0,3]    | 1 [0,2]    | 0 [0,1]       | 1 [0,3]       | 1 [0,3]         | 0 [0,1]          | 0 [0,1]   | 1 [0,2]       | 149 [133,164] | 1 [0,2]       | 43 [32,54]       |
| 6  | 1 [0,2]          | 1 [0,2]             | 6 [2,9]          | 0 [0,1]    | 1 [0,2]    | 0 [0,0]       | 0 [0,1]       | 3 [1,6]         | 1 [0,2]          | 0 [0,1]   | 1 [0,2]       | 5 [1,8]       | 1 [0,3]       | 1 [0,4]          |
| 7  | 1 [0,4]          | 4 [0,11]            | 347 [321,373]    | 4 [0,8]    | 17 [11,23] | 6 [3,10]      | 7 [1,13]      | 4 [0,8]         | 94 [82,107]      | 1 [0,3]   | 1 [0,3]       | 158 [141,176] | 7 [2,12]      | 31 [19,46]       |
| 8  | 1 [0,3]          | 1 [0,2]             | 22 [4,38]        | 1 [0,2]    | 1 [0,2]    | 0 [0,1]       | 4 [0,7]       | 1 [0,4]         | 0 [0,1]          | 0 [0,1]   | 1 [0,2]       | 39 [0,76]     | 1 [0,3]       | 1225 [1132,1325] |
| 9  | 2 [0,6]          | 2 [0,5]             | 25 [0,59]        | 1 [0,4]    | 1 [0,4]    | 0 [0,1]       | 5 [0,11]      | 1 [0,5]         | 1 [0,2]          | 0 [0,1]   | 1 [0,2]       | 109 [14,188]  | 1 [0,4]       | 7260 [7100,7421] |
| 10 | 134 [0,298]      | 62 [0,131]          | 26 [0,68]        | 21 [0,47]  | 24 [0,55]  | 1 [0,2]       | 6 [0,16]      | 3 [0,8]         | 3 [0,8]          | 1 [0,3]   | 1 [0,2]       | 68 [0,174]    | 2 [0,6]       | 30 [0,100]       |
| 11 | 202 [1,368]      | 47 [0,124]          | 28 [0,73]        | 23 [0,52]  | 27 [0,62]  | 1 [0,2]       | 7 [0,19]      | 3 [0,9]         | 3 [0,9]          | 1 [0,3]   | 1 [0,3]       | 62 [0,168]    | 3 [0,8]       | 32 [0,109]       |
| 12 | 56 [0,168]       | 43 [0,108]          | 26 [0,66]        | 17 [0,41]  | 16 [0,43]  | 0 [0,2]       | 6 [0,16]      | 3 [0,8]         | 3 [0,7]          | 1 [0,2]   | 1 [0,2]       | 76 [0,177]    | 2 [0,6]       | 32 [0,106]       |
| 13 | 4 [3,6]          | 2 [0,4]             | 9 [6,13]         | 85 [80,91] | 49 [45,53] | 1 [0,2]       | 152 [145,160] | 8 [5,10]        | 4 [2,6]          | 2 [1,3]   | 15 [13,16]    | 169 [151,167] | 89 [83,95]    | 52 [47,57]       |
| 14 | 1 [0,2]          | 1 [0,2]             | 3 [0,8]          | 29 [23,35] | 59 [50,68] | 1 [0,2]       | 120 [108,133] | 26 [7,45]       | 4 [1,6]          | 1 [0,2]   | 1 [0,3]       | 231 [214,249] | 101 [91,112]  | 109 [95,124]     |
| 15 | 6 [0,21]         | 7 [0,26]            | 446 [92,803]     | 20 [0,64]  | 35 [0,109] | 3 [0,10]      | 51 [0,157]    | 1308 [812,1778] | 5 [0,18]         | 5 [0,16]  | 6 [0,19]      | 77 [0,241]    | 20 [0,64]     | 50 [0,175]       |
| 16 | 14 [0,48]        | 15 [0,50]           | 4436 [2088,6450] | 27 [0,93]  | 46 [0,145] | 4 [0,14]      | 67 [0,208]    | 425 [0,1039]    | 9 [0,31]         | 10 [0,34] | 12 [0,40]     | 107 [0,338]   | 24 [0,77]     | 88 [0,193]       |
| 17 | 14 [0,46]        | 13 [0,46]           | 552 [2,1476]     | 27 [0,88]  | 50 [0,155] | 5 [0,16]      | 53 [0,166]    | 157 [0,464]     | 10 [0,32]        | 10 [0,32] | 17 [0,56]     | 62 [0,206]    | 21 [0,71]     | 42 [0,136]       |
| 18 | 0 [0,1]          | 1 [0,3]             | 1 [0,4]          | 0 [0,1]    | 0 [0,1]    | 0 [0,1]       | 0 [0,1]       | 2 [0,4]         | 0 [0,1]          | 0 [0,1]   | 0 [0,1]       | 0 [0,1]       | 0 [0,1]       | 0 [0,1]          |
| 19 | 16 [0,56]        | 15 [0,53]           | 931 [0,2313]     | 38 [0,124] | 74 [0,229] | 6 [0,20]      | 145 [0,392]   | 265 [0,720]     | 11 [0,39]        | 15 [0,51] | 17 [0,59]     | 136 [0,427]   | 31 [0,98]     | 67 [0,218]       |
| 20 | 0 [0,0]          | 0 [0,0]             | 1 [0,2]          | 17 [16,20] | 4 [3,5]    | 0 [0,1]       | 10 [8,12]     | 1 [0,2]         | 0 [0,1]          | 1 [0,1]   | 24 [22,26]    | 416 [407,425] | 6 [5,8]       | 118 [113,123]    |
| 21 | 1 [0,3]          | 2 [0,6]             | 28 [17,39]       | 64 [54,74] | 58 [48,67] | 0 [0,1]       | 116 [103,129] | 10 [5,17]       | 1 [0,2]          | 2 [1,4]   | 53 [45,62]    | 144 [129,159] | 97 [85,110]   | 44 [34,56]       |
| 22 | 2 [1,3]          | 2 [0,4]             | 146 [140,152]    | 75 [71,79] | 56 [52,59] | 1 [0,1]       | 196 [189,202] | 1 [0,2]         | 5 [4,7]          | 1 [1,2]   | 5 [4,6]       | 252 [244,259] | 169 [164,176] | 107 [102,113]    |
| X  | 0 [0,1]          | 0 [0,1]             | 10 [5,14]        | 1 [0,2]    | 1 [0,2]    | 1 [0,2]       | 6 [3,9]       | 2 [0,3]         | 1 [0,3]          | 0 [0,0]   | 0 [0,1]       | 2 [0,4]       | 4 [1,6]       | 0 [0,2]          |
| Y  | 1 [0,2]          | 4 [0,10]            | 31 [21,42]       | 4 [1,8]    | 68 [56,80] | 372 [343,399] | 187 [168,210] | 7 [2,12]        | 8235 [8110,8354] | 1 [0,3]   | 1 [0,3]       | 22 [15,30]    | 3 [0,6]       | 42 [30,54]       |
