# Supplementary material for: Genomic Characterization of Large Heterochromatic Gaps in the Human Genome Assembly
Source: PubMed Central journal article supplement (PMC4022460; doi:10.1371/journal.pcbi.1003628), 2014-05-15
Supplement: pcbi.1003628.s012.pdf [file pcbi.1003628.s012.pdf]

**Table S8. HSat2,3 annotated on hg19 assembly fragments**

| Assembly Clone Name | Position (hg19)       | HSat2,3 bp by RepeatMasker | arm/cen | HSat2,3 subfamilies assigned |
|---------------------|-----------------------|----------------------------|---------|------------------------------|
| RP11-417J8          | 1:142535434-142731022 | 4224                       | cen     | 3A4                          |
| CH17-158B1          | 2:89830436-90041857   | 45615                      | cen     | 2B,3A1                       |
| CH17-132F21         | 2:90371525-90545103   | 22157                      | cen     | 2B                           |
| RP11-575H3          | 2:91595103-91790098   | 20157                      | cen     | 2B                           |
| CTD-2053H7          | 2:92244957-92326171   | 5001                       | cen     | 2B                           |
| RP11-1281K21        | 4:49076738-49283503   | 61324                      | cen     | 3B3                          |
| RP11-241F15         | 4:49488941-49660117   | 25224                      | cen     | 3B3                          |
| RP11-1324A7         | 7:57518331-57586048   | 7958                       | cen     | 2B,3A4                       |
| XXFOS-8589D1        | 7:61054331-61083324   | 1496                       | cen     | 2B                           |
| RP11-715L17         | 7:61727020-61917157   | 41957                      | cen     | 2B                           |
| RP11-291L22         | 10:38652100-38818835  | 43709                      | cen     | 3A1                          |
| RP11-453N3          | 10:38868835-39075027  | 19185                      | cen     | 2B,3A1                       |
| RP11-96F8           | 10:39075027-39154935  | 72654                      | cen     | 3A2                          |
| RP11-745D9          | 10:42354935-42546687  | 40427                      | cen     | 2A1,3B3                      |
| XX-Y237C10          | 10:42596687-42794387  | 15048                      | cen     | 2B, 3A1                      |
| RP11-313J2          | 10:42794387-42879686  | 21673                      | cen     | 3A1                          |
| CTD-2522B17         | 16:33859975-34023150  | 32034                      | cen     | 2B,3A4                       |
| CTD-2144E22         | 16:34173150-34341696  | 16042                      | cen     | 2B                           |
| RP11-696P19         | 16:46385801-46508594  | 71251                      | cen     | 2B                           |
| RP11-260A9          | 17:25263006-25441564  | 3349                       | cen     | 3A4                          |
| RP5-854E16          | 20:29803908-29874360  | 27468                      | cen     | 3A1                          |
| bP-21264C1          | 21:10084920-10215976  | 1816                       | cen     | 3A4                          |
| CTD-2503J9          | 21:10697896-10906316  | 78276                      | cen     | 3A1,3A4                      |
| c20H12              | 22:16847850-16884805  | 14280                      | cen     | 2B                           |
| RP11-1126J10        | Y:13104553-13143954   | 3840                       | cen     | 3A4                          |
| RP1-85D24           | Y:13193954-13278549   | 1234                       | cen     | 3A4                          |
| RP11-886I11         | Y:13401114-13543063   | 9403                       | cen     | 3A4                          |
| RP11-295P22         | Y:13543063-13748578   | 94044                      | cen     | 3A3                          |
| RP11-75F5           | Y:13798578-13958100   | 64991                      | cen     | 3A2                          |
| RP11-1136L22        | Y:28785151-28819361   | 19233                      | cen     | 3A4                          |
| RP11-242E13         | Y:58819361-58917656   | 90966                      | cen     | 3A6                          |
| RP11-57J19          | Y:58967656-59034049   | 7270                       | cen     | 3A4                          |
| RP11-206L10         | 1:632917-812484       | 2807                       | arm     | 3A1                          |
| RP11-744H18         | 1:149004460-149110998 | 2617                       | arm     | 2B                           |
| RP11-504P24         | 1:224085051-224269695 | 4619                       | arm     | 3A1                          |
| RP11-667F9          | 7:64876309-65008648   | 1145                       | arm     | 2B,3A4                       |
| RP11-383B4          | 10:18804301-18926872  | 19712                      | arm     | -                            |
