# Supplementary material for: Genomic Characterization of Large Heterochromatic Gaps in the Human Genome Assembly
Source: PubMed Central journal article supplement (PMC4022460; doi:10.1371/journal.pcbi.1003628), 2014-05-15
Supplement: pcbi.1003628.s013.pdf [file pcbi.1003628.s013.pdf]

Table S9 (page 1 of 2). Large HSat2,3-associated unmapped scaffolds localized by WCS coverage.

| HuRef SCAF ID<br>NCBI ref. ID   | Non-gap<br>length<br>(bp) | Non-gap<br>non-<br>repeat<br>length<br>(bp) | Unique<br>24-mer<br>count | %<br>seg<br>dup | NCBI gene predictions                                                                                                                                               | Chr(s)<br>assigned<br>by WCS<br>mapping | Genovese<br>admixture<br>map loci<br>[#SNPs] | Levy FISH<br>map loci<br>PRIMARY/<br>SECONDARY                        | HSat2,3<br>read<br>subfams<br>[read ct.]                                                     | HSat2,3<br>mate<br>pair<br>subfams<br>[read ct.]                    |
|---------------------------------|---------------------------|---------------------------------------------|---------------------------|-----------------|---------------------------------------------------------------------------------------------------------------------------------------------------------------------|-----------------------------------------|----------------------------------------------|-----------------------------------------------------------------------|----------------------------------------------------------------------------------------------|---------------------------------------------------------------------|
| 1103279188373<br>NW_001841157.1 | 1,500,749                 | 610,252                                     | 446,252                   | 89.2            | none                                                                                                                                                                | X,Y                                     | X [2]                                        | NA                                                                    | 2A2[8]                                                                                       | 2A2[4]<br>3B5[1]                                                    |
| 1103279188189<br>NW_001841137.1 | 270,611                   | 113,266                                     | 30,200                    | 95              | MIR3118-3<br>(p)SNX18P16<br>(p)LOC644339<br>(p)LOC100129224<br>(p)LOC101060847<br>(p)FLJ43315                                                                       | 9                                       | NA                                           | 13cen 22cen<br>9q13 / 14cen<br>15cen 21cen<br>1q12 4p12               | NONE                                                                                         | 3A4[9]                                                              |
| 1103279181222<br>NW_001839651.1 | 236,390                   | 93,415                                      | 20,586                    | 86.3            | LOC101060792<br>(p)LOC100291626<br>(p)LOC100287702<br>(p)LOC100996901<br>(p)LOC100134412<br>(p)LOC101060784                                                         | 3,14,16,<br>17,19                       | NA                                           | 2cen 14cen<br>22cen 16cen /<br>9q21 9cen<br>15cen 13cen<br>10cen 1q11 | 2B[27]<br>3A4[3]<br>2A2[1]                                                                   | 2B[22]<br>3A4[3]<br>3A1[2]                                          |
| 1103279188307<br>NW_001841150.1 | 168,878                   | 64,308                                      | 15,673                    | 91.4            | LOC101060770<br>(p)LOC101059996                                                                                                                                     | 1                                       | 1 [53]                                       | 1q11 16q11.2<br>7cen / 2p11.2<br>3p21.3 17p11                         | 2B[250]<br>2A1[80]<br>2A2[57]<br>3B1[2]<br>3A4[1]                                            | 2B[43]<br>2A1[4]<br>2A2[1]<br>3B1[1]<br>3A4[1]                      |
| 1103279188429<br>NW_001841160.1 | 172,513                   | 59,515                                      | 14,687                    | 84.1            | (p)LOC101059923<br>(p)LOC101060813                                                                                                                                  | 7                                       | 7 [128]                                      | 1q12 7cen<br>16q11 / 2cen<br>9cen 13cen<br>14cen 15cen<br>22cen       | 2B[312]<br>3B3[124]<br>3B1[11]<br>2A2[11]<br>3B2[10]<br>3B5[7]<br>2A1[3]<br>3B4[1]<br>3A2[1] | 2B[44]<br>3B3[22]<br>3B1[2]<br>3B5[2]<br>2A2[1]<br>3A2[1]<br>3A5[1] |
| 1103279187452<br>NW_001840853.1 | 318,231                   | 49,935                                      | 12,054                    | 90.7            | (p)LOC100996808                                                                                                                                                     | 20                                      | 20 [563]                                     | 20q11 / 9qh<br>13cen 14cen<br>15cen 21cen<br>22cen                    | 3A4[14]                                                                                      | 3A4[15]<br>3B3[1]                                                   |
| 1103279188266<br>NW_001841145.1 | 150,210                   | 46,868                                      | 18,917                    | 50.8            | DUX4L4 LOC100292669<br>(p)LOC100653165<br>(p)DUX4L11<br>(p)LOC100653184<br>(p)LOC101060749<br>(p)LOC100653190<br>(p)LOC100288523<br>(p)LOC649425<br>(p)LOC100134340 | 14,19                                   | NA                                           | NA                                                                    | 3A4[5]                                                                                       | 3A4[5]                                                              |
| 1103279179615<br>NW_001839257.1 | 223,057                   | 43,410                                      | 10,607                    | 84.2            | (p)LOC647654                                                                                                                                                        | 20                                      | 20 [90]                                      | NA                                                                    | 3A4[6]                                                                                       | 3A4[5]                                                              |

Table S9 (page 2 of 2). Large HSat2,3-associated unmapped scaffolds localized by WCS coverage.

| HuRef SCAF ID<br>NCBI ref. ID   | Non-gap<br>length<br>(bp) | Non-gap<br>non-<br>repeat<br>length<br>(bp) | Unique<br>24-mer<br>count | %<br>seg<br>dup | NCBI gene predictions                              | Chr(s)<br>assigned<br>by WCS<br>mapping | Genovese<br>admixture<br>map loci<br>[#SNPs] | Levy FISH<br>map loci<br>PRIMARY/<br>SECONDARY | HSat2,3<br>read<br>subfams<br>[read ct.]                                                                        | HSat2,3<br>mate<br>pair<br>subfams<br>[read ct.] |
|---------------------------------|---------------------------|---------------------------------------------|---------------------------|-----------------|----------------------------------------------------|-----------------------------------------|----------------------------------------------|------------------------------------------------|-----------------------------------------------------------------------------------------------------------------|--------------------------------------------------|
| 1103279188305<br>NW_001841149.1 | 210,648                   | 40,192                                      | 6,298                     | 79.8            | none                                               | 9                                       | 2 [6]<br>9 [2]                               | NA                                             | 2B[282]<br>2A1[10]<br>2A2[9]                                                                                    | 2B[53]<br>2A1[4]                                 |
| 1103279187792<br>NW_001841011.1 | 247,273                   | 35,200                                      | 7,692                     | 79.6            | LOC100132859<br>LOC100505781<br>(p)LOC101060790    | 1                                       | 1 [197]                                      | 1q11 16q21 /<br>2p12 7q12                      | 2B[247]<br>2A2[66]<br>2A1[45]                                                                                   | 2B[50]<br>2A1[7]<br>2A2[6]                       |
| 1103279187616<br>NW_001840933.1 | 48,268                    | 28,883                                      | 8,249                     | 88.5            | none                                               | 14,22                                   | 22 [1]                                       | NA                                             | 3A4[11]                                                                                                         | 3A4[11]                                          |
| 1103279188290<br>NW_001841146.1 | 127,632                   | 26,401                                      | 5,299                     | 72.9            | (p)LOC100134215<br>(p)LOC652301<br>(p)LOC100287990 | 1,16,17,19                              | 1 [4]<br>14 [2]                              | NA                                             | 3A1[319]<br>3A2[31]<br>3B3[15]<br>3B1[13]<br>3B2[9]<br>3A5[7]<br>3A6[3]<br>3B5[2]<br>3A3[1]<br>3B4[1]<br>3A4[1] | 3A1[26]<br>3A2[5]<br>3B3[1]                      |
| 1103279187477<br>NW_001840867.1 | 100,705                   | 23,927                                      | 7,299                     | 73.7            | (p)LOC101060863                                    | 15                                      | 15 [1]                                       | 20cen / 15cen<br>13cen 22cen                   | 3A4[3]                                                                                                          | 3A4[7]                                           |
| 1103279181301<br>NW_001839668.1 | 53,723                    | 20,196                                      | 5,117                     | 85.2            | none                                               | 7                                       | 7 [1]                                        | 7p11 / 2cen<br>1qh 16qh                        | 3A2[14]<br>2B[5]<br>3A3[3]                                                                                      | 3A2[7]<br>3A3[3]<br>2B[1]                        |
| 1103279180187<br>NW_001839391.1 | 19,905                    | 10,996                                      | 1,448                     | 88.2            | FAM138D (p)WASH3P                                  | 20                                      | NA                                           | NA                                             | 3A4[6]                                                                                                          | 3A4[3]                                           |
| 1103276878137<br>(NA)           | 12,911                    | 10,320                                      | 3,657                     | 86.2            | NA                                                 | 13,21                                   | NA                                           | NA                                             | NONE                                                                                                            | 3A4[8]<br>3A5[1]                                 |
| 1103276806665<br>(NA)           | 21,097                    | 10,102                                      | 3,713                     | 89              | NA                                                 | 2                                       | NA                                           | NA                                             | 2B[34]                                                                                                          | 2B[37]<br>2A2[2]<br>3A2[1]<br>2A1[1]             |
| <b>TOTAL</b>                    | 3,882,801                 | 1,287,186                                   | 617,748                   | 86.2            |                                                    |                                         |                                              |                                                |                                                                                                                 |                                                  |
