# Supplementary material for: Genomic Characterization of Large Heterochromatic Gaps in the Human Genome Assembly
Source: PubMed Central journal article supplement (PMC4022460; doi:10.1371/journal.pcbi.1003628), 2014-05-15
Supplement: pcbi.1003628.s014.pdf [file pcbi.1003628.s014.pdf]

**Table S10. Experimental validation of HSat 2,3 associated unmapped scaffolds with reference to Cytogenetic Resource of FISH-mapped, Sequence-tagged Clones.**

| Scaffold ID          | chrs assigned by WCS coverage (this study) | FISH assignment (CytoBAC, HuRef)                                                                                                                                                                |
|----------------------|--------------------------------------------|-------------------------------------------------------------------------------------------------------------------------------------------------------------------------------------------------|
| chr4_gl000193_random | 13,14,21                                   | 9p12,4q35,14p11.1-14p11.2,9q12,4q28,21q11.1-21q11.2,13p11.1-13p11.2                                                                                                                             |
| chrUn_gl000212       | 13,17,19                                   | 2p11.2-2p12,22cen,13cen                                                                                                                                                                         |
| AC237676.1           | 13,14,21,22                                | 15p11.1-15p11.2,Yp11.1-Yp11.2,1q12,2p13,3q11.2,4p16.3,9p12,9q12,21p11.1-21p11.2,2q11.1-2q11.2,20q11.1-20q11.2,21p13,13p13,13p11.1-13p11.2,22p11.1-22p11.2,14p13,15p13,4p11-4q11,14p11.1-14p11.2 |
| AC104301.2           | 20                                         | 18p11.3,15p11.1-15p11.2,4q35,3q13.3-3q21,16p11.1-16p11.2,Yp11.1-Yp11.2,9p12-9p13,21p11.1-21p11.2,20q11.1-20q11.2,13p11.1-13p11.2,22p11.1-22p11.2,14p11.1-14p11.2,3p12-3p13                      |
| AC146634.1           | 13,14,21                                   | 4q35,21q11.2,13p11.1-13p11.2,14p11.1-14q11.1                                                                                                                                                    |
| AC093749.3           | 14                                         | 3q28~29                                                                                                                                                                                         |
| FP885534.9           | 6                                          | 6q21,6q22                                                                                                                                                                                       |
| AC093614.4           | 7                                          | 7pter                                                                                                                                                                                           |
| AC010098.8           | 1                                          | 9p12,10p11.2,2p11.1-2p11.2,10q11.2,1q12,22q11.2,9q12-9q13,14q11.2,7p11.2,15q11.2,16p11.2,7q11.2,17p11.2,17q11.2                                                                                 |
| NW_001838589.2       | 1                                          | 1p12                                                                                                                                                                                            |
| NW_001838799.1       | 2                                          | 2p11                                                                                                                                                                                            |
| NW_001838877.2       | 3                                          | 3p14                                                                                                                                                                                            |
| NW_001838990.2       | 6                                          | 6q21                                                                                                                                                                                            |
| NW_001838996.1       | 6                                          | 6q25                                                                                                                                                                                            |
| NW_001838988.2       | 6                                          | 7p11 / 6q21                                                                                                                                                                                     |
| NW_001839024.1       | 7                                          | 7cen / 1cen, 2cen, 16cen, 15cen, 17cen                                                                                                                                                          |
| NW_001839181.1       | 9,19                                       | 9q12, 9p11 / 9q21, 4p16, 12q13, 13cen, 14cen, 15cen                                                                                                                                             |
| NW_001838286.2       | 16                                         | 7q11, 16q11 / 1q12, 2p11, 22cen, 13/14/15cen                                                                                                                                                    |
| NW_001838666.1       | 20                                         | 5cen, 17cen, 19cen, 20cen / 10cen, 22cen                                                                                                                                                        |
| NW_001841138.1       | 20                                         | 15p13, 20cen, 22cen, 14cen / 2q13                                                                                                                                                               |
| NW_001840780.1       | 20                                         | 9cen, 13cen, 15cen, 20cen, 21cen, 22cen / 9q2, 14cen, 4q3                                                                                                                                       |
| NW_001840853.1       | 20                                         | 20q11 / 9qh, 13cen, 14cen, 15cen, 21cen, 22cen                                                                                                                                                  |
| NW_001839651.1       | 3,14,16,17,19                              | 2cen, 14cen, 22cen, 16cen / 9q21, 9cen, 15cen, 13cen, 10cen, 1q11                                                                                                                               |
| NW_001841150.1       | 1                                          | 1q11, 16q11.2, 7cen / 2p11.2, 3p21.3, 17p11                                                                                                                                                     |
| NW_001840871.1       | 14,22                                      | 1q12, 16p13, 15q11 / 14cen, 13cen                                                                                                                                                               |
| NW_001840306.1       | 13                                         | 13q34                                                                                                                                                                                           |
| NW_001841011.1       | 1                                          | 1q11, 16q21 / 2p12, 7q12                                                                                                                                                                        |
| NW_001840146.1       | 14,22                                      | 1q42                                                                                                                                                                                            |
| NW_001841160.1       | 7                                          | 1q12, 7cen, 16q11 / 2cen, 9cen, 13cen, 14cen, 15cen, 22cen                                                                                                                                      |
| NW_001840937.1       | 14,22                                      | 22p11.2 / 20cen, 9p13, 14cen, 15cen                                                                                                                                                             |
| NW_001839668.1       | 7                                          | 7p11 / 2cen, 1qh, 16qh                                                                                                                                                                          |
| NW_001839364.1       | 3                                          | 6p12.1, 3p14                                                                                                                                                                                    |
| NW_001840016.1       | 7                                          | 7q11                                                                                                                                                                                            |
| NW_001840984.1       | 13                                         | 13q33                                                                                                                                                                                           |
| NW_001841149.1       | 9                                          | 9p11                                                                                                                                                                                            |
